# Supplementary material for: Syntheses, structures and photoluminescent properties of a series of metal–organic frameworks based on a flexible tetracarboxylic acid and different bis(imidazole) ligands
Source: Royal Society of Chemistry journal article supplement (doi:10.1039/c1ce05235g), 2011-01-01
Supplement: c1ce05235g.pdf [file c1ce05235g.pdf]

Supplementary Material (ESI) for CrystEngComm

**Syntheses, structures and photoluminescent properties of a series of metal-organic frameworks based on a flexible tetracarboxylic acid and different bis(imidazole) Ligands**

**Wei-Qiu Kan, Ying-Ying Liu, Jin Yang,\* Yun-Yu Liu and Jian-Fang Ma\***

*Key Lab of Polyoxometalate Science, Department of Chemistry, Northeast Normal University, Changchun 130024, People's Republic of China*

\* Correspondence authors

E-mail: yangjinnenu@yahoo.com.cn (J. Yang)

E-mail: jianfangma@yahoo.com.cn (J.-F. Ma)

Fax: +86-431-85098620 (J.-F. Ma)

**Table S1.** Selected bond distances (Å) and angles (°) for **1**.

|                     |            |                      |            |
|---------------------|------------|----------------------|------------|
| Co(1)-O(9)#1        | 1.981(4)   | Co(1)-O(7)#2         | 2.000(4)   |
| Co(1)-O(1)          | 2.085(4)   | Co(1)-O(4)#3         | 2.097(4)   |
| Co(1)-O(2)          | 2.273(5)   | Co(1)-O(3)#3         | 2.313(4)   |
| Co(2)-O(10)#4       | 2.056(5)   | Co(2)-O(8)           | 2.073(4)   |
| Co(2)-O(2W)         | 2.083(4)   | Co(2)-O(1W)          | 2.092(5)   |
| Co(2)-O(3W)         | 2.094(5)   | Co(2)-O(4)#5         | 2.182(3)   |
| O(9)#1-Co(1)-O(7)#2 | 101.25(17) | O(9)#1-Co(1)-O(1)    | 143.58(18) |
| O(7)#2-Co(1)-O(1)   | 97.31(17)  | O(9)#1-Co(1)-O(4)#3  | 106.89(16) |
| O(7)#2-Co(1)-O(4)#3 | 102.26(16) | O(1)-Co(1)-O(4)#3    | 99.31(18)  |
| O(9)#1-Co(1)-O(2)   | 90.25(18)  | O(7)#2-Co(1)-O(2)    | 91.37(17)  |
| O(1)-Co(1)-O(2)     | 58.08(19)  | O(4)#3-Co(1)-O(2)    | 155.26(16) |
| O(9)#1-Co(1)-O(3)#3 | 88.50(17)  | O(7)#2-Co(1)-O(3)#3  | 160.65(18) |
| O(1)-Co(1)-O(3)#3   | 83.90(16)  | O(4)#3-Co(1)-O(3)#3  | 58.64(15)  |
| O(2)-Co(1)-O(3)#3   | 105.40(16) | O(10)#4-Co(2)-O(8)   | 98.25(17)  |
| O(10)#4-Co(2)-O(2W) | 84.40(18)  | O(8)-Co(2)-O(2W)     | 91.60(16)  |
| O(10)#4-Co(2)-O(1W) | 174.81(17) | O(8)-Co(2)-O(1W)     | 85.66(17)  |
| O(2W)-Co(2)-O(1W)   | 92.11(17)  | O(10)#4-Co(2)-O(3W)  | 88.90(19)  |
| O(8)-Co(2)-O(3W)    | 172.8(2)   | O(2W)-Co(2)-O(3W)    | 89.95(17)  |
| O(1W)-Co(2)-O(3W)   | 87.25(19)  | O(10)#4-Co(2)-O(4)#5 | 94.66(15)  |
| O(8)-Co(2)-O(4)#5   | 86.85(14)  | O(2W)-Co(2)-O(4)#5   | 178.06(17) |
| O(1W)-Co(2)-O(4)#5  | 88.94(16)  | O(3W)-Co(2)-O(4)#5   | 91.74(15)  |

Symmetry codes for **1**: #1 -x+3/2, y-1/2, -z+3/2; #2 x-1, y, z-1; #3 -x+3/2, y-1/2,

$-z+1/2$ ; #4  $-x+5/2, y-1/2, -z+5/2$ ; #5  $-x+5/2, y-1/2, -z+3/2$ .

**Table S2.** Selected bond distances (Å) and angles (°) for **2**.

|                   |            |                     |            |
|-------------------|------------|---------------------|------------|
| Co(1)-O(3)#1      | 1.957(2)   | Co(1)-O(1)          | 2.000(3)   |
| Co(1)-N(4)        | 2.006(3)   | Co(1)-N(1)#2        | 2.035(3)   |
| O(3)#1-Co(1)-O(1) | 107.02(11) | O(3)#1-Co(1)-N(4)   | 107.71(11) |
| O(1)-Co(1)-N(4)   | 120.64(12) | O(3)#1-Co(1)-N(1)#2 | 95.53(12)  |
| O(1)-Co(1)-N(1)#2 | 111.37(12) | N(4)-Co(1)-N(1)#2   | 111.38(12) |

Symmetry codes for **2**: #1  $x-1/2, -y+1/2, z-1/2$ ; #2  $-x+5/2, y+1/2, -z+1/2$ .

**Table S3.** Selected bond distances (Å) and angles (°) for **3**.

|                   |            |                     |            |
|-------------------|------------|---------------------|------------|
| Co(1)-O(3)#1      | 1.9556(18) | Co(1)-O(1)          | 1.9951(19) |
| Co(1)-N(4)        | 2.012(2)   | Co(1)-N(1)#2        | 2.025(3)   |
| O(3)#1-Co(1)-O(1) | 106.35(8)  | O(3)#1-Co(1)-N(4)   | 109.48(8)  |
| O(1)-Co(1)-N(4)   | 118.64(9)  | O(3)#1-Co(1)-N(1)#2 | 95.47(9)   |
| O(1)-Co(1)-N(1)#2 | 115.94(9)  | N(4)-Co(1)-N(1)#2   | 108.29(10) |

Symmetry codes for **3**: #1  $x+1/2, -y+1/2, z+1/2$ ; #2  $-x-1/2, y+1/2, -z+1/2$ .

**Table S4.** Selected bond distances (Å) and angles (°) for **4**.

|                     |            |                   |            |
|---------------------|------------|-------------------|------------|
| Co(1)-O(1)          | 1.9638(17) | Co(1)-O(4)#1      | 1.985(2)   |
| Co(1)-N(4)          | 2.012(2)   | Co(1)-N(1)#2      | 2.033(2)   |
| O(1)-Co(1)-O(4)#1   | 107.15(8)  | O(1)-Co(1)-N(4)   | 108.20(9)  |
| O(4)#1-Co(1)-N(4)   | 120.10(10) | O(1)-Co(1)-N(1)#2 | 96.58(9)   |
| O(4)#1-Co(1)-N(1)#2 | 115.11(9)  | N(4)-Co(1)-N(1)#2 | 106.95(10) |

Symmetry codes for **4**: #1  $x-1/2, -y+1/2, z-1/2$ ; #2  $-x-1/2, y+1/2, -z+1/2$ .

**Table S5.** Selected bond distances (Å) and angles (°) for **5**.

|              |          |               |          |
|--------------|----------|---------------|----------|
| Co(1)-O(3)   | 2.010(3) | Co(1)-O(4)#1  | 2.036(3) |
| Co(1)-N(1)   | 2.042(3) | Co(1)-O(10)#2 | 2.045(3) |
| Co(1)-O(9)#3 | 2.251(2) | Co(1)-O(9)#2  | 2.400(3) |
| Co(2)-N(4)   | 2.029(5) | Co(2)-N(5)    | 2.052(4) |
| Co(2)-O(6)#4 | 2.055(3) | Co(2)-O(11)#5 | 2.101(2) |

|                       |            |                      |            |
|-----------------------|------------|----------------------|------------|
| Co(2)-O(12)#5         | 2.218(3)   | Co(2)-O(5)#4         | 2.369(3)   |
| O(3)-Co(1)-O(4)#1     | 159.46(9)  | O(3)-Co(1)-N(1)      | 98.87(11)  |
| O(4)#1-Co(1)-N(1)     | 95.37(11)  | O(3)-Co(1)-O(10)#2   | 95.55(11)  |
| O(4)#1-Co(1)-O(10)#2  | 94.28(11)  | N(1)-Co(1)-O(10)#2   | 107.21(11) |
| O(3)-Co(1)-O(9)#3     | 83.09(11)  | O(4)#1-Co(1)-O(9)#3  | 81.59(10)  |
| N(1)-Co(1)-O(9)#3     | 92.41(11)  | O(10)#2-Co(1)-O(9)#3 | 160.27(10) |
| O(3)-Co(1)-O(9)#2     | 83.47(10)  | O(4)#1-Co(1)-O(9)#2  | 86.35(10)  |
| N(1)-Co(1)-O(9)#2     | 165.79(10) | O(10)#2-Co(1)-O(9)#2 | 58.57(9)   |
| O(9)#3-Co(1)-O(9)#2   | 101.80(8)  | N(4)-Co(2)-N(5)      | 100.04(19) |
| N(4)-Co(2)-O(6)#4     | 96.65(18)  | N(5)-Co(2)-O(6)#4    | 95.97(15)  |
| N(4)-Co(2)-O(11)#5    | 102.08(17) | N(5)-Co(2)-O(11)#5   | 105.36(13) |
| O(6)#4-Co(2)-O(11)#5  | 148.45(13) | N(4)-Co(2)-O(12)#5   | 161.71(18) |
| N(5)-Co(2)-O(12)#5    | 90.70(14)  | O(6)#4-Co(2)-O(12)#5 | 96.90(13)  |
| O(11)#5-Co(2)-O(12)#5 | 60.51(9)   | N(4)-Co(2)-O(5)#4    | 90.72(15)  |
| N(5)-Co(2)-O(5)#4     | 152.96(14) | O(6)#4-Co(2)-O(5)#4  | 57.92(12)  |
| O(11)#5-Co(2)-O(5)#4  | 96.39(11)  | O(12)#5-Co(2)-O(5)#4 | 86.13(11)  |

Symmetry codes for **5**: #1 -x+4, -y+1, -z-1; #2 x+1, y, z; #3 -x+3, -y+1, -z-1; #4 -x+4, -y, -z-1; #5 -x+3, -y, -z.

**Table S6.** Selected bond distances (Å) and angles (°) for **6**.

|                   |            |                     |            |
|-------------------|------------|---------------------|------------|
| Co(1)-O(1)        | 1.965(3)   | Co(1)-O(4)#1        | 2.041(3)   |
| Co(1)-N(4)        | 2.052(4)   | Co(1)-N(5)          | 2.052(4)   |
| Co(1)-O(3)#1      | 2.354(4)   | Co(2)-O(8)#2        | 1.980(3)   |
| Co(2)-N(8)        | 2.035(4)   | Co(2)-N(1)#3        | 2.067(4)   |
| Co(2)-N(1)#3      | 2.067(4)   | Co(2)-O(9)#4        | 2.131(3)   |
| Co(2)-O(10)#4     | 2.245(4)   |                     |            |
| O(1)-Co(1)-O(4)#1 | 133.35(15) | O(1)-Co(1)-N(4)     | 112.09(18) |
| O(4)#1-Co(1)-N(4) | 106.00(17) | O(1)-Co(1)-N(5)     | 99.21(17)  |
| O(4)#1-Co(1)-N(5) | 99.00(18)  | N(4)-Co(1)-N(5)     | 100.91(17) |
| O(1)-Co(1)-O(3)#1 | 92.44(14)  | O(4)#1-Co(1)-O(3)#1 | 58.98(13)  |

|                      |            |                      |            |
|----------------------|------------|----------------------|------------|
| N(4)-Co(1)-O(3)#1    | 93.14(16)  | N(5)-Co(1)-O(3)#1    | 156.73(16) |
| O(8)#2-Co(2)-N(8)    | 106.10(17) | O(8)#2-Co(2)-N(1)#3  | 103.90(17) |
| N(8)-Co(2)-N(1)#3    | 102.83(17) | O(8)#2-Co(2)-O(9)#4  | 140.98(15) |
| N(8)-Co(2)-O(9)#4    | 99.68(16)  | N(1)#3-Co(2)-O(9)#4  | 98.20(17)  |
| O(8)#2-Co(2)-O(10)#4 | 89.36(15)  | N(8)-Co(2)-O(10)#4   | 94.56(17)  |
| N(1)#3-Co(2)-O(10)#4 | 154.01(16) | O(9)#4-Co(2)-O(10)#4 | 59.46(14)  |

Symmetry codes for **6**: #1  $x-1/2, -y-3/2, z$ ; #2  $x-1/2, -y-1/2, z-1$ ; #3  $x, y+1, z$ ; #4  $x, y, z-1$ .

**Table S7.** Selected bond distances (Å) and angles (°) for **7**.

|                     |            |                   |            |
|---------------------|------------|-------------------|------------|
| Ni(1)-O(1)          | 1.992(3)   | Ni(1)-N(5)        | 2.042(4)   |
| Ni(1)-O(3)#1        | 2.051(3)   | Ni(1)-N(4)        | 2.060(4)   |
| Ni(1)-N(1)#2        | 2.103(4)   |                   |            |
| O(1)-Ni(1)-N(5)     | 105.35(16) | O(1)-Ni(1)-O(3)#1 | 160.07(16) |
| N(5)-Ni(1)-O(3)#1   | 94.18(16)  | O(1)-Ni(1)-N(4)   | 90.51(14)  |
| N(5)-Ni(1)-N(4)     | 97.78(16)  | O(3)#1-Ni(1)-N(4) | 90.73(14)  |
| O(1)-Ni(1)-N(1)#2   | 84.96(14)  | N(5)-Ni(1)-N(1)#2 | 92.01(17)  |
| O(3)#1-Ni(1)-N(1)#2 | 90.53(14)  | N(4)-Ni(1)-N(1)#2 | 170.01(17) |

Symmetry codes for **7**: #1  $x, y-1, z$ ; #2  $x, y, z+1$ .

**Table S8.** Selected bond distances (Å) and angles (°) for **8**.

|                     |            |                     |            |
|---------------------|------------|---------------------|------------|
| Ni(1)-N(4)          | 2.035(5)   | Ni(1)-N(5)          | 2.043(5)   |
| Ni(1)-O(9)#1        | 2.083(3)   | Ni(1)-O(3)#2        | 2.120(3)   |
| Ni(1)-O(4)#2        | 2.132(4)   | Ni(1)-O(10)#1       | 2.188(4)   |
| Ni(2)-N(1)#3        | 2.009(6)   | Ni(2)-N(8)          | 2.042(5)   |
| Ni(2)-O(8)#4        | 2.072(3)   | Ni(2)-O(1)          | 2.086(3)   |
| Ni(2)-O(7)#4        | 2.160(4)   | Ni(2)-O(2)          | 2.180(4)   |
| N(4)-Ni(1)-N(5)     | 93.51(19)  | N(4)-Ni(1)-O(9)#1   | 90.74(17)  |
| N(5)-Ni(1)-O(9)#1   | 102.25(17) | N(4)-Ni(1)-O(3)#2   | 100.68(18) |
| N(5)-Ni(1)-O(3)#2   | 94.48(17)  | O(9)#1-Ni(1)-O(3)#2 | 159.14(15) |
| N(4)-Ni(1)-O(4)#2   | 162.66(17) | N(5)-Ni(1)-O(4)#2   | 89.68(17)  |
| O(9)#1-Ni(1)-O(4)#2 | 105.25(14) | O(3)#2-Ni(1)-O(4)#2 | 62.05(14)  |

|                      |            |                      |            |
|----------------------|------------|----------------------|------------|
| N(4)-Ni(1)-O(10)#1   | 90.73(16)  | N(5)-Ni(1)-O(10)#1   | 163.43(16) |
| O(9)#1-Ni(1)-O(10)#1 | 61.65(13)  | O(3)#2-Ni(1)-O(10)#1 | 100.46(14) |
| O(4)#2-Ni(1)-O(10)#1 | 91.02(14)  | N(1)#3-Ni(2)-N(8)    | 100.3(2)   |
| N(1)#3-Ni(2)-O(8)#4  | 97.36(19)  | N(8)-Ni(2)-O(8)#4    | 95.14(17)  |
| N(1)#3-Ni(2)-O(1)    | 95.9(2)    | N(8)-Ni(2)-O(1)      | 98.50(18)  |
| O(8)#4-Ni(2)-O(1)    | 158.94(17) | N(1)#3-Ni(2)-O(7)#4  | 89.17(19)  |
| N(8)-Ni(2)-O(7)#4    | 156.29(18) | O(8)#4-Ni(2)-O(7)#4  | 61.89(14)  |
| O(1)-Ni(2)-O(7)#4    | 102.12(16) | N(1)#3-Ni(2)-O(2)    | 156.65(19) |
| N(8)-Ni(2)-O(2)      | 89.07(19)  | O(8)#4-Ni(2)-O(2)    | 103.10(15) |
| O(1)-Ni(2)-O(2)      | 61.34(15)  | O(7)#4-Ni(2)-O(2)    | 90.60(15)  |

Symmetry codes for **8**: #1 -x+1, -y+1, -z+2; #2 x, y-1, z; #3 x-1/2, -y+3/2, z+1/2; #4 -x+1/2, y+1/2, -z+5/2.

**Table S9.** Selected bond distances (Å) and angles (°) for **9**.

|                     |            |                   |            |
|---------------------|------------|-------------------|------------|
| Zn(1)-O(1)          | 1.942(2)   | Zn(1)-O(4)#1      | 1.970(2)   |
| Zn(1)-N(1)#2        | 1.992(3)   | Zn(1)-N(4)        | 2.026(3)   |
| O(1)-Zn(1)-O(4)#1   | 108.59(10) | O(1)-Zn(1)-N(1)#2 | 109.63(11) |
| O(4)#1-Zn(1)-N(1)#2 | 116.96(11) | O(1)-Zn(1)-N(4)   | 96.21(11)  |
| O(4)#1-Zn(1)-N(4)   | 109.96(11) | N(1)#2-Zn(1)-N(4) | 113.42(12) |

Symmetry codes for **9**: #1 x+1/2, -y+1/2, z+1/2; #2 -x+3/2, y-1/2, -z+3/2.

**Table S10.** Selected bond distances (Å) and angles (°) for **10**.

|                     |            |                   |            |
|---------------------|------------|-------------------|------------|
| Zn(1)-O(2)          | 1.9425(18) | Zn(1)-O(4)#1      | 1.9768(19) |
| Zn(1)-N(1)          | 1.996(2)   | Zn(1)-N(4)#2      | 2.025(2)   |
| O(2)-Zn(1)-O(4)#1   | 108.31(9)  | O(2)-Zn(1)-N(1)   | 111.28(9)  |
| O(4)#1-Zn(1)-N(1)   | 116.49(9)  | O(2)-Zn(1)-N(4)#2 | 96.45(9)   |
| O(4)#1-Zn(1)-N(4)#2 | 113.93(10) | N(1)-Zn(1)-N(4)#2 | 108.59(10) |

Symmetry codes for **10**: #1 x-1/2, -y+1/2, z-1/2; #2 -x+1/2, y+1/2, -z+1/2.

**Table S11.** Selected bond distances (Å) and angles (°) for **11**.

|                   |            |                 |            |
|-------------------|------------|-----------------|------------|
| Zn(1)-O(1)        | 1.952(3)   | Zn(1)-O(4)#1    | 1.964(3)   |
| Zn(1)-N(1)        | 1.996(4)   | Zn(1)-N(4)#2    | 2.016(3)   |
| O(1)-Zn(1)-O(4)#1 | 109.55(13) | O(1)-Zn(1)-N(1) | 109.95(14) |

|                     |            |                   |            |
|---------------------|------------|-------------------|------------|
| O(4)#1-Zn(1)-N(1)   | 116.72(14) | O(1)-Zn(1)-N(4)#2 | 97.99(13)  |
| O(4)#1-Zn(1)-N(4)#2 | 113.04(14) | N(1)-Zn(1)-N(4)#2 | 107.99(15) |

Symmetry codes for **11**: #1  $x-1/2, -y+1/2, z-1/2$ ; #2  $-x-1/2, y+1/2, -z+1/2$ .

**Table S12.** Selected bond distances (Å) and angles (°) for **12**.

|                       |            |                      |            |
|-----------------------|------------|----------------------|------------|
| Zn(1)-O(4)#1          | 1.950(2)   | Zn(1)-O(10)#2        | 1.955(2)   |
| Zn(1)-N(1)            | 1.985(3)   | Zn(1)-O(11)#3        | 2.0084(19) |
| Zn(2)-O(9)#4          | 1.913(2)   | Zn(2)-N(4)           | 1.973(3)   |
| Zn(2)-O(2)            | 1.975(2)   | Zn(2)-O(3)#5         | 2.018(2)   |
| O(4)#1-Zn(1)-O(10)#2  | 109.73(10) | O(4)#1-Zn(1)-N(1)    | 119.66(11) |
| O(10)#2-Zn(1)-N(1)    | 117.31(11) | O(4)#1-Zn(1)-O(11)#3 | 98.55(9)   |
| O(10)#2-Zn(1)-O(11)#3 | 104.42(9)  | N(1)-Zn(1)-O(11)#3   | 103.83(10) |
| O(9)#4-Zn(2)-N(4)     | 122.93(10) | O(9)#4-Zn(2)-O(2)    | 106.54(10) |
| N(4)-Zn(2)-O(2)       | 110.14(11) | O(9)#4-Zn(2)-O(3)#5  | 98.63(10)  |
| N(4)-Zn(2)-O(3)#5     | 112.36(10) | O(2)-Zn(2)-O(3)#5    | 104.34(9)  |

Symmetry codes for **12**: #1  $x, y-1, z-1$ ; #2  $x, y-1, z$ ; #3  $-x+1, -y+2, -z+1$ ; #4  $-x, -y+2, -z+1$ ; #5  $-x+1, -y+2, -z+2$ .

**Table S13.** Selected bond distances (Å) and angles (°) for **13**.

|                     |            |                   |            |
|---------------------|------------|-------------------|------------|
| Zn(1)-O(1)          | 1.9195(19) | Zn(1)-O(4)#1      | 1.941(2)   |
| Zn(1)-O(3)#2        | 1.956(2)   | Zn(1)-N(1)        | 2.003(3)   |
| O(1)-Zn(1)-O(4)#1   | 119.63(9)  | O(1)-Zn(1)-O(3)#2 | 96.12(9)   |
| O(4)#1-Zn(1)-O(3)#2 | 114.72(9)  | O(1)-Zn(1)-N(1)   | 113.70(10) |
| O(4)#1-Zn(1)-N(1)   | 101.66(11) | O(3)#2-Zn(1)-N(1) | 111.53(12) |

Symmetry codes for **13**: #1  $x, y-1, z$ ; #2  $-x+1, -y+1, -z$ .

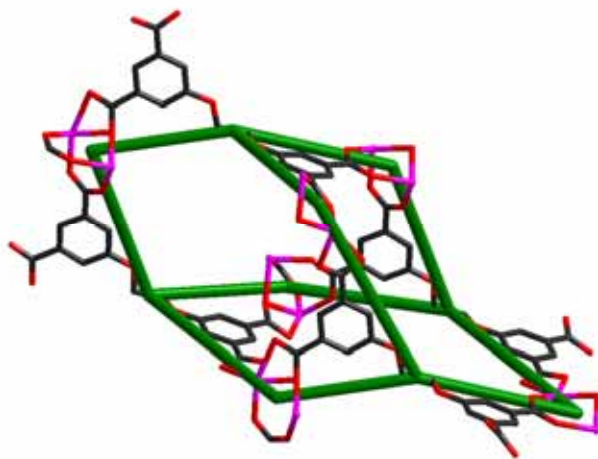

**Fig. S1** Single adamantanoid cage in compound 1.

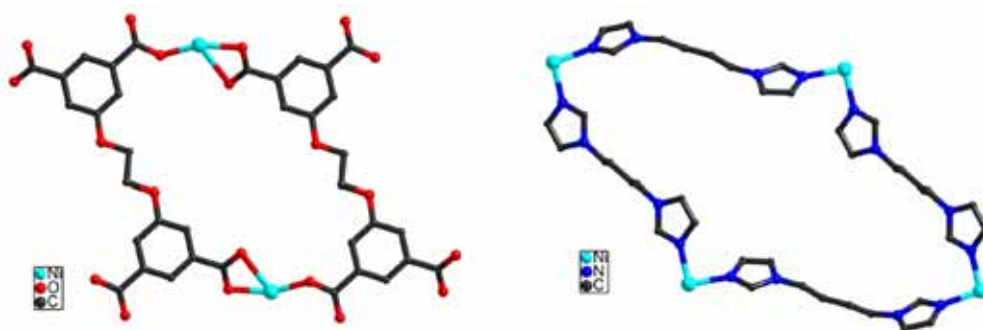

**Fig. S2** Ring I (left) and Ring II (right) in compound 7.



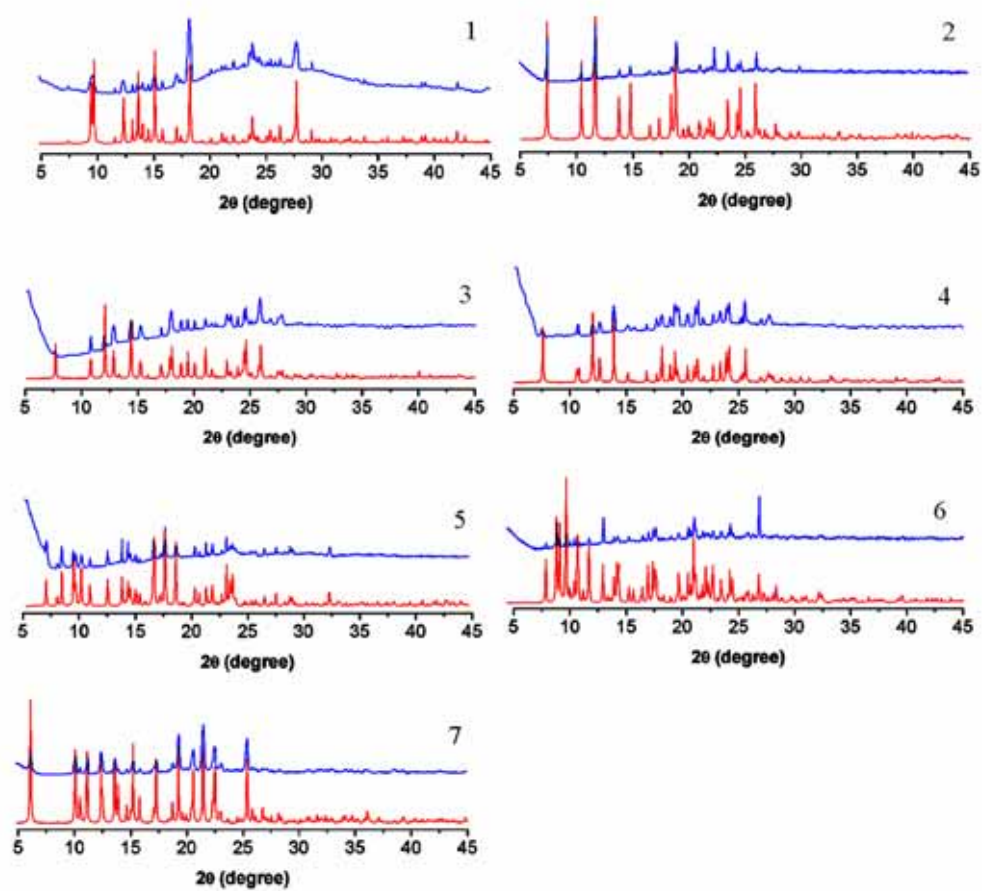

**Fig. S3** Simulated (red) and experimental (blue) PXRD patterns of **1-7**.

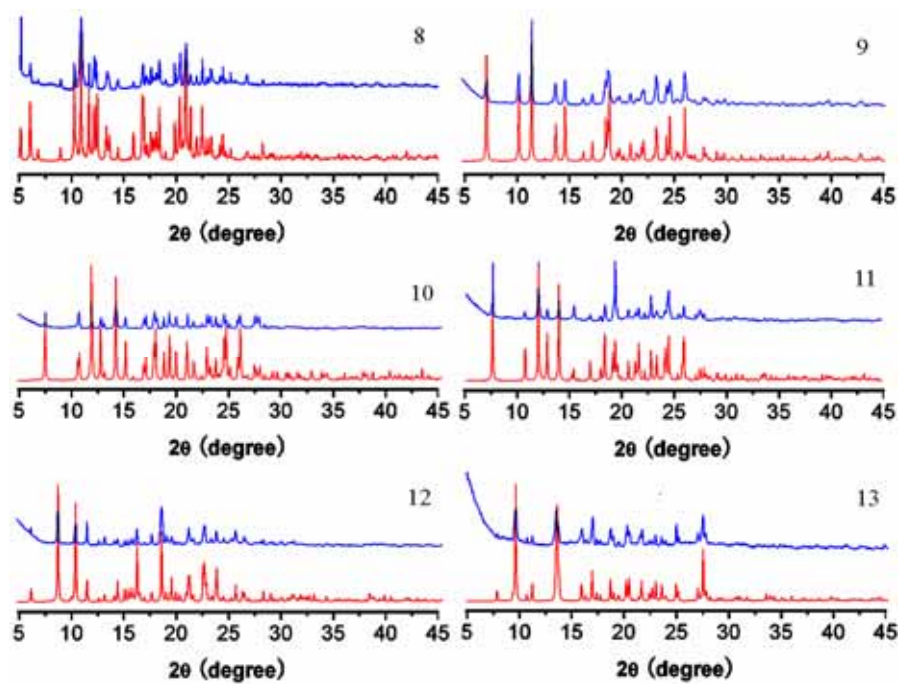

**Fig. S4** Simulated (red) and experimental (blue) PXRD patterns of **8-13**.

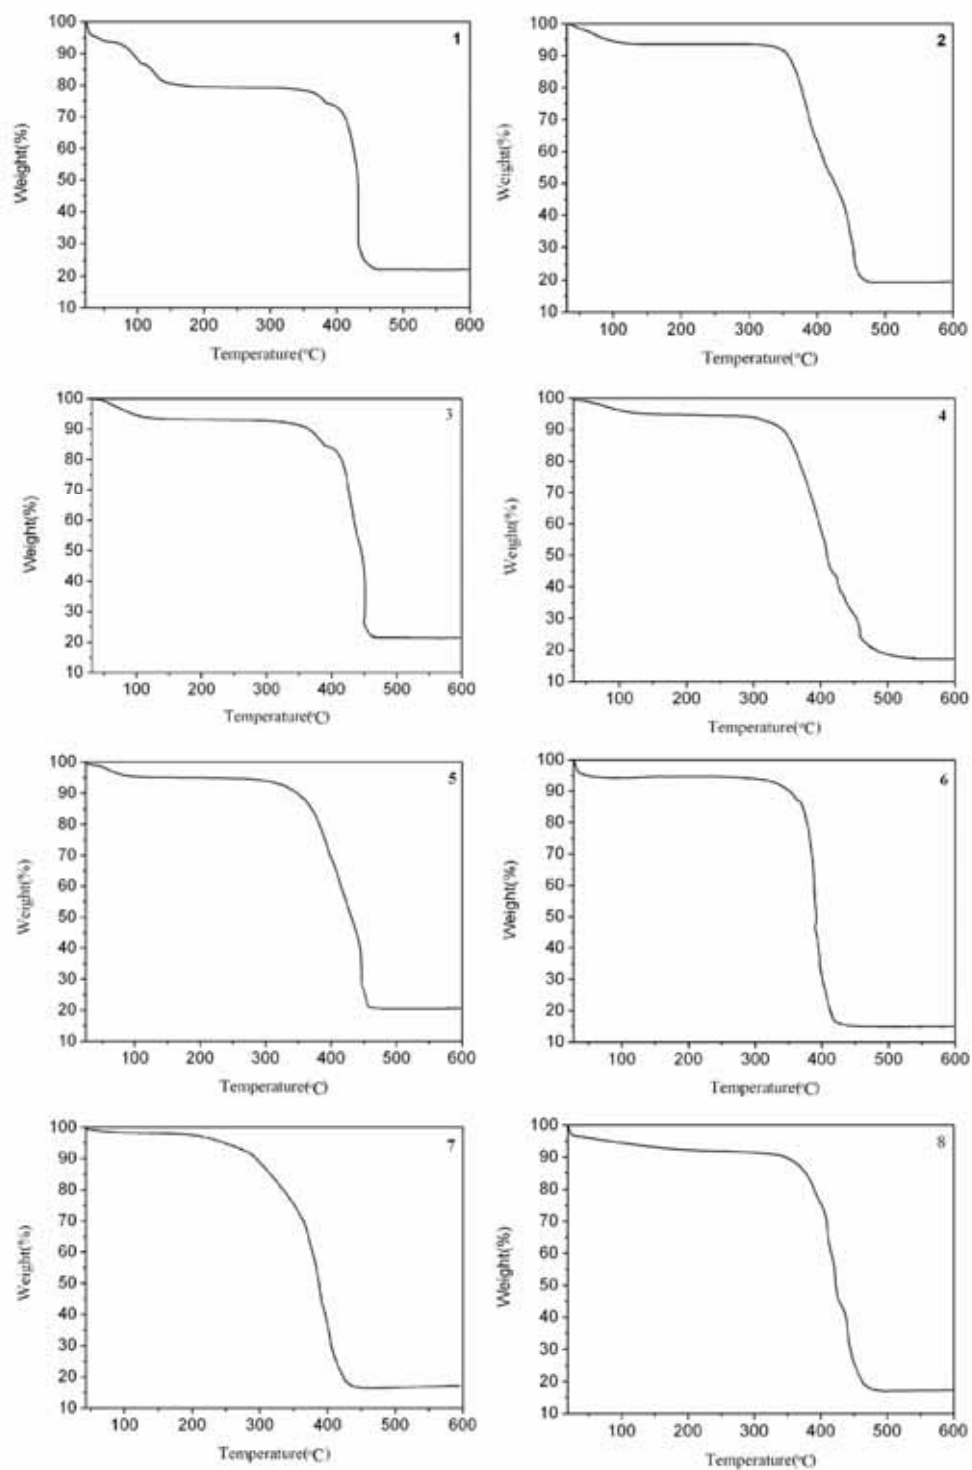

**Fig. S5** The TGA curves of compounds **1-8**.

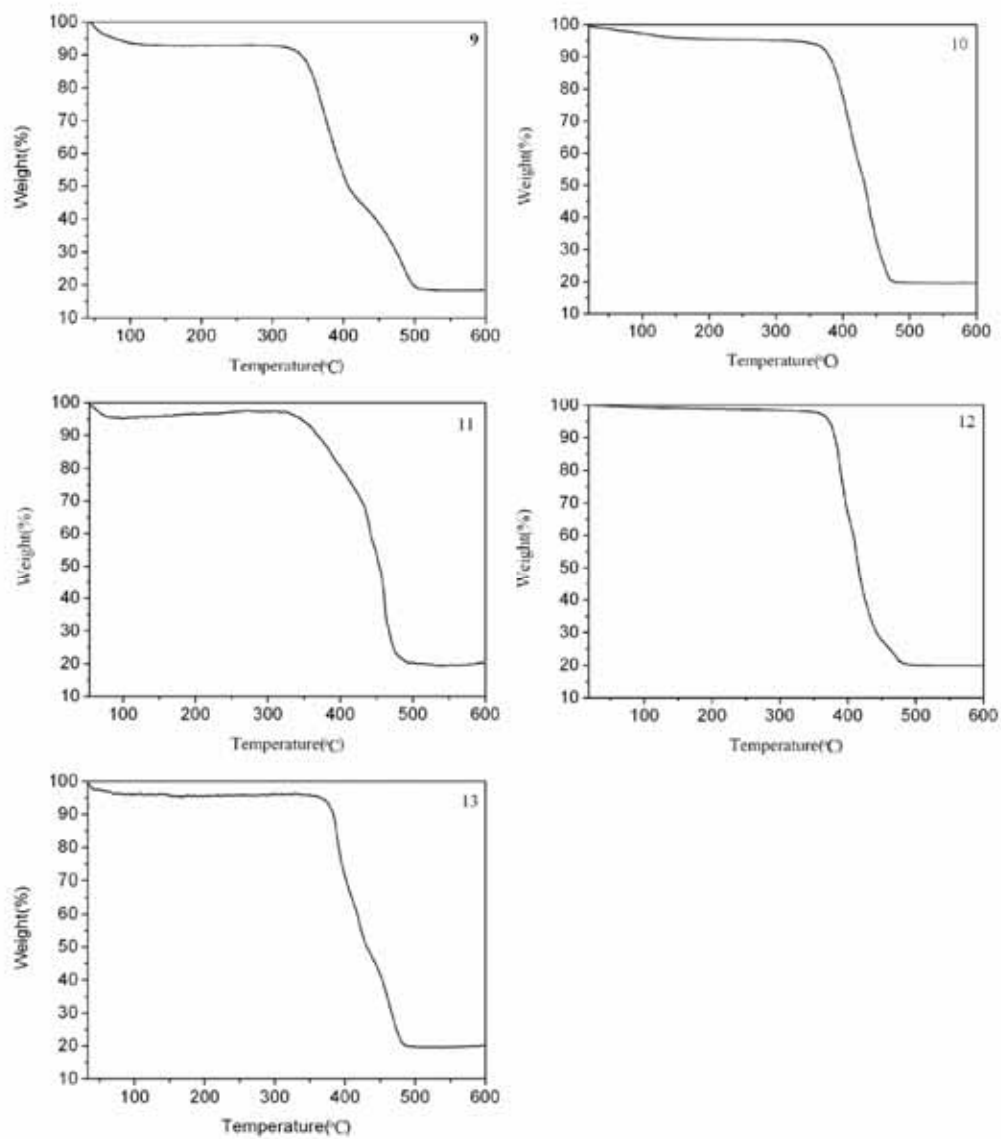

**Fig. S6** The TGA curves of compounds **9-13**
